# Supplementary material
Source: PubMed Central journal article supplement (PMC1413667)
Supplement: pnas_0510774103_5.pdf [file pnas_0510774103_5.pdf]

**Table 1. Summary of the association of adherens junction proteins with VE-cadherin regulated by integrin engagement and Ras transformation**

| Adherens junction proteins associated with VE-cadherin | Regulated by        |                    |
|--------------------------------------------------------|---------------------|--------------------|
|                                                        | Integrin engagement | Ras transformation |
| $\alpha$ -catenin                                      | Yes                 | No                 |
| $\beta$ -catenin                                       | No                  | No                 |
| $\gamma$ -catenin                                      | Yes                 | No                 |
| P120 <sup>ctn</sup>                                    | No                  | Yes                |
| Src                                                    | No                  | Yes                |
| Shc                                                    | No                  | Yes                |
| SH-PTP2                                                | No                  | Yes                |
