# Supplementary material
Source: PubMed Central journal article supplement (PMC1413667)

**Control Medium**

**Beads+PI**

**Beads+Fn**

**PP1**

**Beads+Fn**

**SU6656**

**Beads+Fn**

**$\gamma$ -catenin**

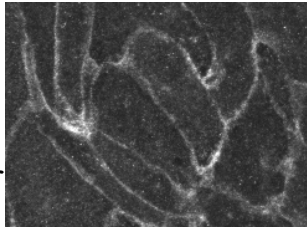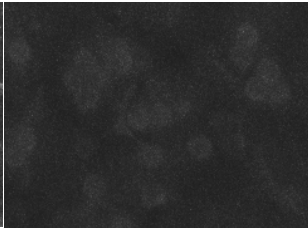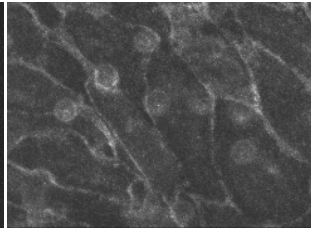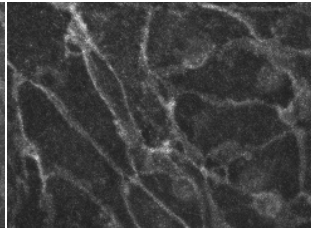

Supplement: pnas_0510774103_1.pdf [file pnas_0510774103_1.pdf]

**Src**

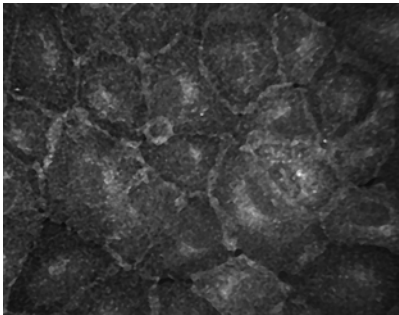

**Active Src**

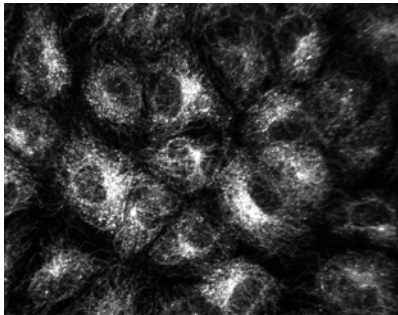

**Overlay**

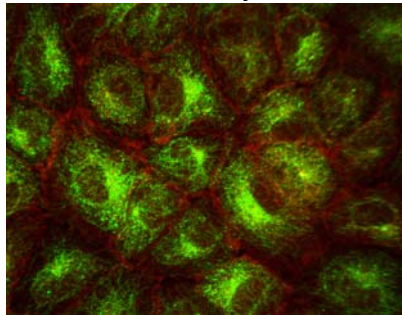

Supplement: pnas_0510774103_2.pdf [file pnas_0510774103_2.pdf]

$\gamma$ -catenin and FAK (pY397)

---

Beads+PI

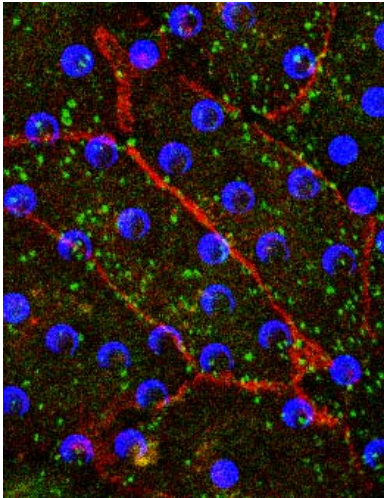

Beads+Fn

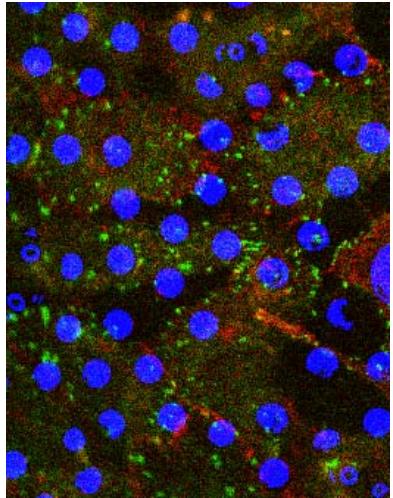

Supplement: pnas_0510774103_3.pdf [file pnas_0510774103_3.pdf]

**Microtubules**

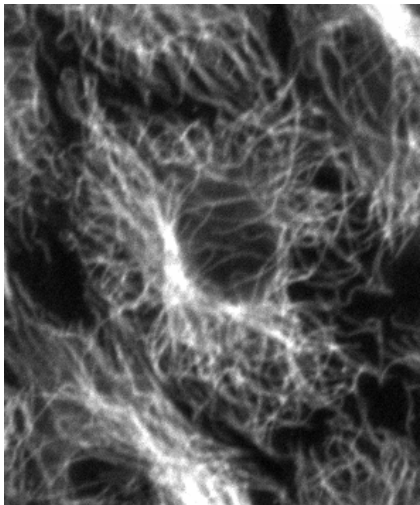

**Active Src**

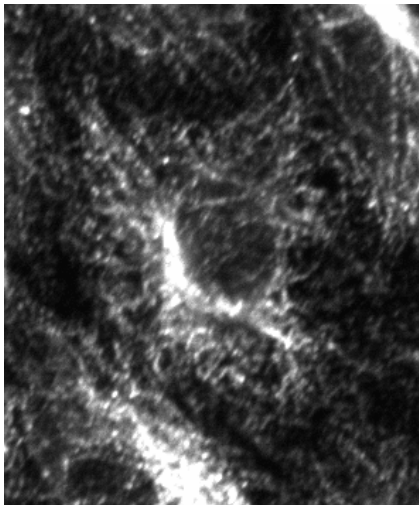

**Overlay**

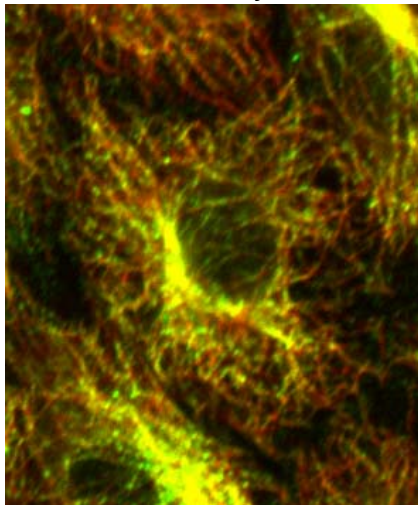

Supplement: pnas_0510774103_4.pdf [file pnas_0510774103_4.pdf]
